# Supplementary material
Source: Research Square preprint supplement (doi:10.21203/rs.3.rs-10272264/v1)
Supplement: Supplementary file 1 [file be41b34f28cf66f670aa0e5d.xlsx]

## Sheet: README
Research Data File
Manuscript	Macroeconomic Effects of Smart Port-Driven Technological Efficiency Shocks in Türkiye: A Computable General Equilibrium Analysis
Purpose	This workbook provides supplementary research data generated from the GAMS-based CGE simulations.
Prepared for	Humanities & Social Sciences Communications submission package
Date	2026-07-06
Workbook contents
Sheet	Description
Macro_Results	Base, scenario and percentage-change results for utility (UU), GDP, and net exports (NX).
Single_Index_Results	Base, scenario and percentage-change values for one-dimensional model variables and prices.
Two_Index_Results	Base, scenario and percentage-change values for two-dimensional model variables.
Codebook	Variable and sector abbreviations used in the workbook.
Notes
1	Values are exported from the calibrated GAMS CGE model.
2	Percentage-change values are reported as percentage changes from the benchmark equilibrium.
3	Very small values close to zero may appear in scientific notation due to numerical precision.

## Sheet: Macro_Results
Macro Results
	UU	GDP	NX
Base	5695.53	28254.9	-765.66
Scenario	5706.82	28256.5	-765.66
%Change	0.198249	0.00573951	-2.37571e-13
Note: %Change is calculated relative to the benchmark equilibrium. NX is unchanged within numerical precision.

## Sheet: Single_Index_Results
Single-Index Model Results
		INDS	SERV	ENGY	TRNS	indus	serve	enrgy	trnsp	LAB	CAP
Base	E					9472.95	421.956	450.956	795.82
Base	PX	19737.4	24047.5	3639.01	3988.81
Base	Q					40251.1	20174.5	5420.33	3176.13
Base	Q_l	35320.4	20140	5331.87	3761.89
Base	Dxs	23332.2	25361.4	3674.53	3828.96
Base	DXd					17506.6	24897	3870.06	4773.32
Base	MI	10247.4	457.973	935.967	266.05
Base	xp					9591.38	5268.31	835.766	543.758
Base	Xv					5014.47	4685.9	102.092
Base	Xg					222.698	3262.29	71.4156	22.8327
Base	pz					0.976844	1.01454	0.98133	1.16515
Base	FH									7755.5	5915.92
Scenario	E					9444.87	421.956	450.956	822.724
Scenario	PX	19737.4	24070.6	3648.45	4000.65
Scenario	Q					40238.4	20139.5	5373.58	3135.44
Scenario	Q_l	35320.4	20140	5331.87	3761.89
Scenario	Dxs	23308.8	25313.3	3644.83	3781.91
Scenario	DXd					17547.2	25002.7	3874.02	4773.32
Scenario	MI	10260.8	460.255	925.648	259.434
Scenario	xp					9612.77	5266.68	839.329	548.776
Scenario	Xv					5029.53	4688.06	102.606
Scenario	Xg					222.698	3254.02	71.5605	22.9921
Scenario	pz					0.975323	1.01357	0.978792	1.14524
Scenario	FH									7755.5	5915.92
%Change	E					-0.296422			3.3807
%Change	PX		0.0958669	0.25937	0.296804
%Change	Q					-0.0315456	-0.173503	-0.862559	-1.28101
%Change	Dxs	-0.100385	-0.189455	-0.808342	-1.22858
%Change	DXd					0.231499	0.424781	0.102294
%Change	MI	0.131527	0.498094	-1.10255	-2.48648
%Change	xp					0.22299	-0.0310137	0.426331	0.922785
%Change	Xv					0.300413	0.0462132	0.503911
%Change	Xg						-0.253438	0.202889	0.698238
%Change	pz					-0.155684	-0.0957751	-0.258699	-1.70918

## Sheet: Two_Index_Results
Two-Index Model Results
			indus	serve	enrgy	trnsp
Base	F	LAB	1891.89	5334.54	128.26	400.81
Base	F	CAP	5448.53	8538.49	619.06	2053.28
Base	X	indus	10335.1	3928.01	1282.37	404.06
Base	X	serve	1178.33	4698.38	167.35	491.98
Base	X	enrgy	754.55	1164.29	1443.64	597.62
Base	X	trnsp	339.34	650.37	34.27	789.74
Scenario	F	LAB	1891.89	5356.82	128.376	440.235
Scenario	F	CAP	5448.53	8574.16	619.62	2255.25
Scenario	X	indus	10335.1	3944.42	1283.53	365.423
Scenario	X	serve	1178.33	4718.01	167.501	444.936
Scenario	X	enrgy	754.55	1169.15	1444.95	540.475
Scenario	X	trnsp	339.34	653.087	34.301	714.224
%Change	F	LAB		0.417702	0.0904463	9.8363
%Change	F	CAP		0.417702	0.0904463	9.8363
%Change	X	indus	1.76001e-14	0.417702	0.0904463	-9.56209
%Change	X	serve	1.92963e-14	0.417702	0.0904463	-9.56209
%Change	X	enrgy	1.50668e-14	0.417702	0.0904463	-9.56209
%Change	X	trnsp	1.67512e-14	0.417702	0.0904463	-9.56209

## Sheet: Codebook
Codebook
Sector abbreviations
INDS / indus	Industry sector
SERV / serve	Services sector
ENGY / enrgy	Energy sector
TRNS / trnsp	Transportation sector
LAB	Labor
CAP	Capital
Model variables
UU	Household utility / welfare indicator
GDP	Gross domestic product
NX	Net exports
E	Exports
PX	Production / activity value indicator
Q	Armington composite good
Q_l	Domestic composite demand / local quantity variable
Dxs	Domestic sector supply
DXd	Domestic good demand
MI	Imports
xp	Household consumption
Xv	Investment demand
Xg	Government consumption
pz	Supply price of the good
FH	Household factor revenues
F	Factor input by sector
X	Intermediate input by origin and destination sector
Scenario labels
Base	Benchmark equilibrium before the technological efficiency shock
Scenario	Model solution after the technological efficiency shock
%Change	Percentage change from the benchmark equilibrium
